# Supplementary material for: Impacts of the invasive shot hole borer (Euwallacea kuroshio) are linked to sewage pollution in southern California: the Enriched Tree Hypothesis
Source: PeerJ. 2019 May 1;7:e6812. doi: 10.7717/peerj.6812 (PMC6500373; doi:10.7717/peerj.6812)
Supplement: Supplemental Information 1 — These data are used in Fig. 2. [file peerj-07-6812-s001.xlsx]

## Sheet: TJ data - raw
2017
month	Start Date	Volume (Gallons)	surface water impacted
2	2017-01-01	143000000	TJ
3	2017-03-01	145000	Goat Canyon
4	2017-04-24	143000	TJ
4	2017-04-24	12000	TJ
4	2017-04-30	645000	Goat Canyon			790000	Goat Canyon
5	2017-05-21	1560	TJ
5	2017-05-21	400000	TJ
5	2017-05-24	3800	TJ
5	2017-05-25	335000	TJ
6	2017-06-09	42800	TJ
6	2017-06-10	161670	TJ
6	2017-06-12	66570	TJ
6	2017-06-20	100000	yogurt canyon
6	2017-06-27	5500000	TJ
7	2017-07-31	1720000	TJ
8	2017-08-07	311000	TJ
8	2017-08-17	411000	TJ		25
9	2017-09-09	3900000	TJ
9	2017-09-12	192000	TJ
9	2017-09-19	38000	TJ
10	2017-10-06	4152000	TJ
10	2017-10-11	80800	TJ
10	2017-10-19	1207000	TJ
10	2017-10-22	228000	TJ
12	2017-12-11	223000	TJ
	Start Date	Volume (Gallons)
1	2016-01-16	6620000	TJ
1	2016-01-17	8450000	TJ
1	2016-01-19	2080000	TJ
1	2016-01-20	2090000	TJ
1	2016-01-21	1600000	TJ
1	2016-01-23	2170000	TJ
1	2016-01-23	720000	TJ
1	2016-01-24	1440000	TJ
1	2016-01-25	940000	TJ
1	2016-01-26	480000	TJ
1	2016-01-28	2238	TJ
1	2016-01-29	690000	TJ
2	2016-02-12	370000	TJ
4	2016-04-05	4860000	TJ
6	2016-06-30	440000	TJ		21
7	2016-07-02	1320000	TJ
7	2016-07-04	33000	TJ
9	2016-09-05	390	TJ - del Sol
9	2016-09-08	690000	TJ
10	2016-10-26	920000	YOGURT
11	2016-11-29	200000	GOAT CAN
	Start Date	Volume
2	2015-02-12	53000	TJ
2	2015-02-14	172000	TJ
6	2015-06-17	47600	TJ
7	2015-07-25	556000	YOGURT
7	2015-07-31	846400	TJ
8	2015-08-02	2165930	TJ
8	2015-08-03	1592945	TJ
8	2015-08-06	437465	TJ
8	2015-08-08	109366	TJ
9	2015-09-19	7729398	TJ
10	2015-10-13	1350000	TJ
10	2015-10-14	1240000	TJ		15
10	2015-10-17	1300000	TJ
11	2015-11-19	1310000	TJ
12	2015-12-11	2060000	TJ
					61

## Sheet: TJ data - monthly TJRV only
		2017	2016	2015
	J	0	27282238	0
	F	143000000	370000	225000
	M	0	0	0
	A	155000	4860000	0
	M	740360	0	0
	J	5771040	440000	47600
	J	1720000	1353000	846400
	A	722000	0	4305706
	S	8282000	690390	7729398
	O	5667800	0	3890000
	N	0	0	1310000
	D	223000	0	2060000

## Sheet: SD Co - raw
					place	date	VOLreaching	VOL recovered	SPILL VOL
2015	J
	F				mission bay	2016-01-05	6750734	188640	6562094
	M				LAKE SAN MARCOS	2016-04-26	57420	17500	39920
	A				sd river	2017-01-21	15500	0	15500
	M				el cajon	2017-02-28	900000	0	900000
	J				san marcos	2017-02-28	434490	338250	96240
	J				sd bay	2017-02-27	22500	0	22500
	A				sd river	2017-02-27	60000	58600	1400	too small
	S				escondido	2017-03-05	47661	6000	41661
	O				north county	2017-10-29	20000	15000	5000	too small
	N
	D
2016	J	6562094
	F
	M
	A	39920
	M
	J
	J
	A
	S
	O
	N
	D
2017	J	15500
	F	1018740
	M	41661
	A
	M
	J
	J
	A
	S
	O
	N
	D

## Sheet: SD Co - monthly
2015	J
	F
	M
	A
	M
	J
	J
	A
	S
	O
	N
	D
2016	J	6562094
	F
	M
	A	39920
	M
	J
	J
	A
	S
	O
	N
	D
2017	J	15500
	F	1018740
	M	41661
	A
	M
	J
	J
	A
	S
	O
	N
	D
		7677915
